# Supplementary material for: A porous 3D-RGO@MWCNT hybrid material as Li–S battery cathode
Source: publisher site journal article supplement (doi:10.3762/bjnano.10.52), 2019-02-21
Supplement: Additional file 1 [file 2190-4286-10-52-S1.pdf]

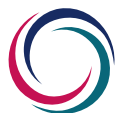

## Supporting Information

for

### **A porous 3D-RGO@MWCNT hybrid material as Li–S battery cathode**

Yongguang Zhang, Jun Ren, Yan Zhao, Taizhe Tan, Fuxing Yin and Yichao Wang

*Beilstein J. Nanotechnol.* **2019**, *10*, 514–521. [doi:10.3762/bjnano.10.52](https://doi.org/10.3762/bjnano.10.52)

## Additional experimental data

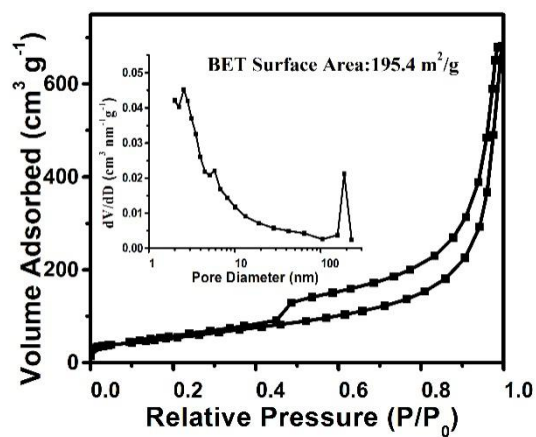

**Figure S1:** Nitrogen adsorption/desorption isotherms for 3D-RGO@MWCNT.

Inset: Pore size distribution of the 3D-RGO@MWCNT.

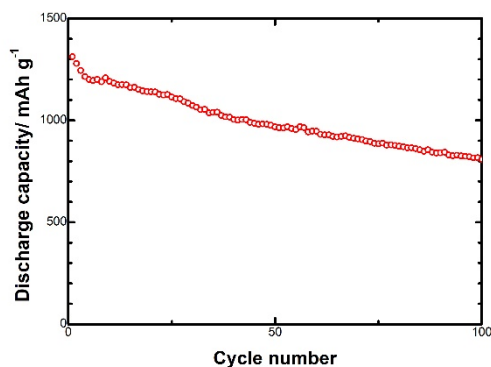

**Figure S2:** Cycling performance of the S-3D-RGO@MWCNT cathode with a sulfur content of 74% at 1C for 100 cycles.
